# Supplementary material
Source: Springer Nature journal article supplement (https://www.springermedizin.de/resource/supplementary/13046_2014_777_MOESM1_ESM.pdf/9662920)

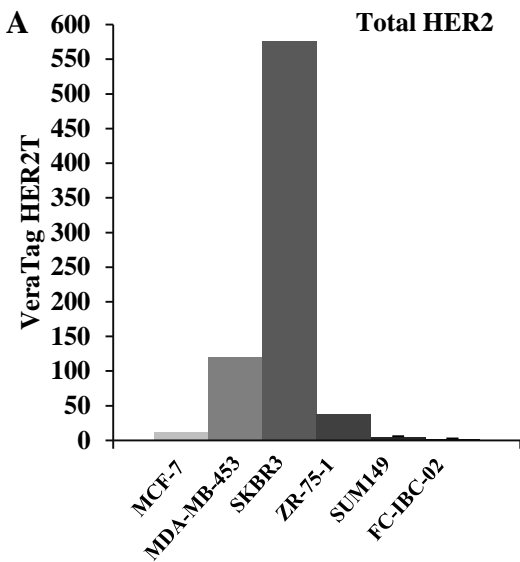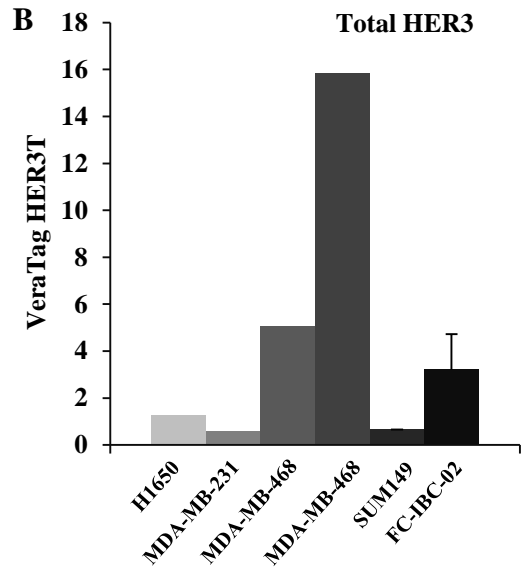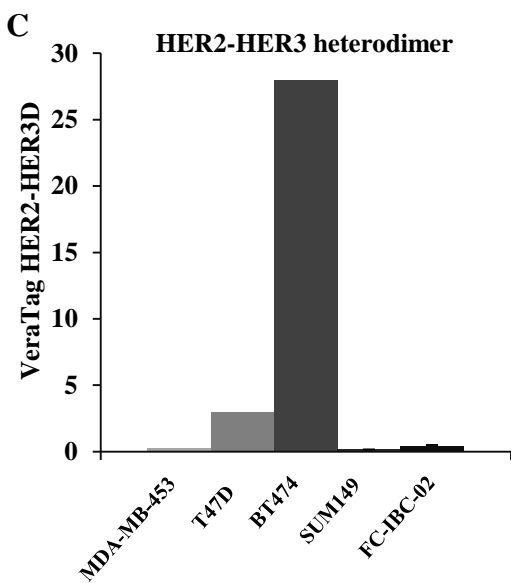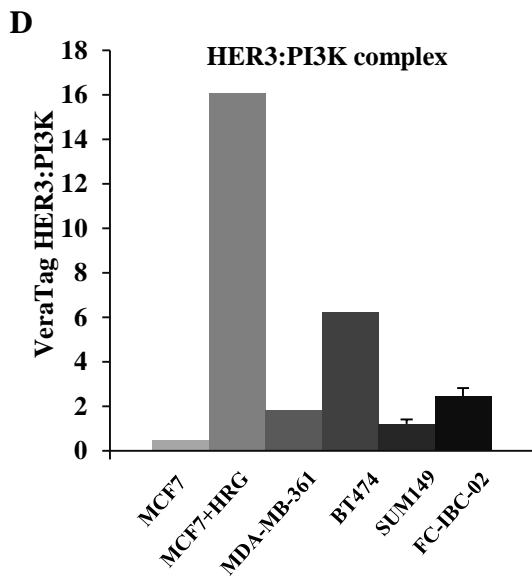

Supplement: MOESM1 [file 9662920]
